# Supplementary material for: Hypoxia-inducible factor 1 protects hypoxic astrocytes against glutamate toxicity
Source: PubMed Central journal article supplement — ASN Neuro. 2012 May 30;4(4):e00090. doi: 10.1042/AN20120006 (PMC3363983; doi:10.1042/an20120006), 2012-05-30
Supplement: an004e090add.pdf [file an004e090add.pdf]

# Hypoxia-inducible factor 1 protects hypoxic astrocytes against glutamate toxicity

Yomna Badawi<sup>\*†</sup>, Prabhu Ramamoorthy<sup>†</sup> and Honglian Shi<sup>\*†1</sup>

<sup>\*</sup>Neuroscience Program and Department of Pharmacology and Toxicology, University of Kansas, Lawrence, KS 66045, U.S.A.

<sup>†</sup>Department of Pharmacology and Toxicology, University of Kansas, Lawrence, KS 66045, U.S.A.

Cite this article as: Badawi Y, Ramamoorthy P and Shi H (2012) Hypoxia-inducible factor 1 protects hypoxic astrocytes against glutamate toxicity. ASN NEURO 4(4):art:e00090.doi:10.1042/AN20120006

Key words: brain ischaemia, cell viability, glutamate, glutathione, hypoxia-inducible factor 1, stroke.

## SUPPLEMENTARY DATA

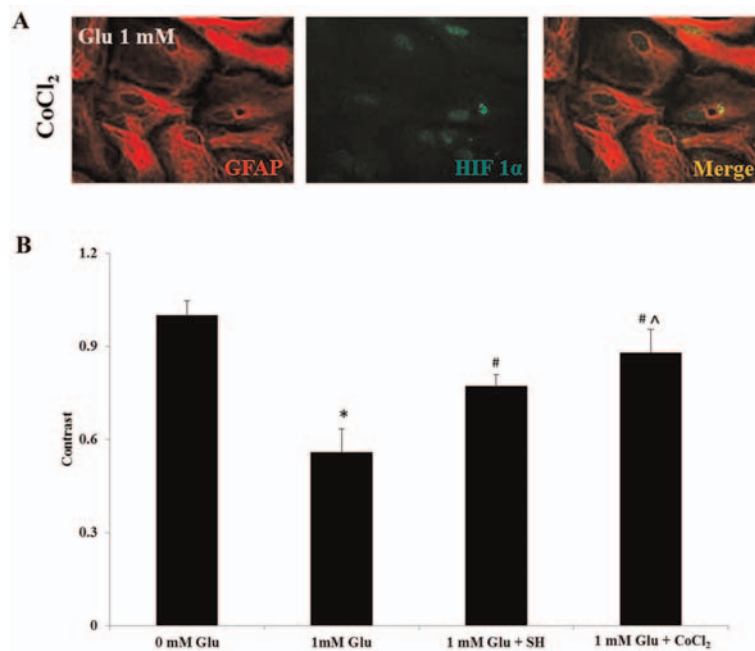

**Figure S1** CoCl<sub>2</sub> (cobalt chloride) further reduces astrocyte damage induced by Glu  
**(A)** Immunostaining characterization of cultured rat cortical astrocytes. Representative images depicting GFAP (red) and HIF-1α (green) in astrocytes treated with 0.3 mM CoCl<sub>2</sub> and 1 mM glutathione under N (normoxia, 21% O<sub>2</sub>) for 3 h. **(B)** Quantification of morphology using one of the 13 features computed from each cell to measure and compare texture. Astrocytes were treated with 0 and 1 mM Glu under N (normoxia, 21% O<sub>2</sub>), 1 mM Glu exposed to SH (severe hypoxia, 0.1% O<sub>2</sub>) and 0 mM CoCl<sub>2</sub> and 1 mM Glu under normoxia (N, 21% O<sub>2</sub>) for 3 h. \**P*<0.05 versus 0 mM Glu under N, #*P*<0.05 versus 1 mM Glu under N, ^*P*<0.005 versus 1 mM Glu under N (*n*=3).

<sup>1</sup> To whom correspondence should be addressed (email hshi@ku.edu).

**Abbreviations:** BSO, L-butathione sulfoximine; CNS, central nervous system; DAPI, 4',6-diamidino-2-phenylindole; DMEM, Dulbecco's modified Eagle's medium; ENT-1, equilibrative nucleoside transporter 1; EPO, erythropoietin; FBS, fetal bovine serum; GFAP, glial fibrillary acidic protein; Glu, glutamate; GSH, reduced glutathione; HBSS, Hanks balanced salt solution; HIF-1, hypoxia-inducible factor-1; HO-1, haem oxygenase 1; HSP, heat-shock protein; LDH, lactate dehydrogenase; MCB, monochlorobimane; MTT, 3-(4,5-dimethylthiazol-2-yl)-2,5-diphenyl-2H-tetrazolium bromide; ROS, reactive oxygen species; VEGF, vascular endothelial growth factor; YC-1, 3-(5-hydroxymethyl-20-furyl)-1-benzylindazole; 2Me2, 2-methoxyoestradiol.

© 2012 The Author(s) This is an Open Access article distributed under the terms of the Creative Commons Attribution Non-Commercial Licence (<http://creativecommons.org/licenses/by-nc/2.5/>) which permits unrestricted non-commercial use, distribution and reproduction in any medium, provided the original work is properly cited.
